# Supplementary material
Source: PubMed Central journal article supplement (PMC4706235)
Supplement: NIHMS729841-supplement-supp1.pdf [file NIHMS729841-supplement-supp1.pdf]

# Supplementary Material to

Title: Improved Statistical Significance of Clustering

Authors: Hanwen Huang, Yufeng Liu, Ming Yuan, and J. S. Marron

## A Proof of all Theorems

Before giving the proofs of our theorems, we provide the following two lemmas which will be used for our proofs of the theorems.

**Lemma 1.** *von Neumann's lower bound trace inequality: for  $d$ -dimensional positive semi-definite matrices  $A$  and  $B$ , denote  $\lambda_j(A)$  ( $j = 1, \dots, d$ ) as the  $j$ th eigenvalue of  $A$ , then  $\text{trace}(AB) \geq \sum_{j=1}^d \lambda_j(A)\lambda_{d-j+1}(B)$ .*

Proof. From von Neumann's trace inequality (Mirsky, 1975), we have

$$\begin{aligned} \text{trace}(A[\lambda_1(B)I - B]) &\leq \sum_j \lambda_j(A)\lambda_j(\lambda_1(B)I - B) \\ &= \sum_j \lambda_j(A)[\lambda_1(B) - \lambda_{d-j+1}(B)] \\ &= \lambda_1(B) \sum_j \lambda_j(A) - \sum_j \lambda_j(A)\lambda_{d-j+1}(B), \end{aligned}$$

which implies the lower bound

$$\text{trace}(AB) \geq \sum_j \lambda_j(A)\lambda_{d-j+1}(B)$$

since

$$\text{trace}(A(\lambda_1(B)I - B)) = \lambda_1(B)\text{trace}(A) - \text{trace}(AB).$$

This completes the proof of Lemma 1.

Define  $\alpha = 1/\sigma_N^2$ . Now consider the optimization problem

$$\min_{d_1, \dots, d_d} \left[ -\sum_{k=1}^d \ln(\alpha - d_k) + \sum_{k=1}^d \tilde{\lambda}_k(\alpha - d_k) \right] \quad (\text{A.1})$$

$$\text{subject to } 0 \leq d_k \leq \alpha, \#\{k : d_k > 0\} \leq l, k = 1, \dots, d. \quad (\text{A.2})$$

Let  $\hat{d}_1, \dots, \hat{d}_d$  be the solution to (A.1) (A.2) and  $\hat{D} = \text{diag}(\hat{d}_1, \dots, \hat{d}_d)$ . Then the following lemma establishes the relationship between  $\hat{D}$  and the solution to (7) (8) (9).

**Lemma 2.** *The solution to (7) (8) (9) is  $\tilde{U}(\alpha I - \hat{D})\tilde{U}^T$ .*

Proof. Assume that the solution of (A.1) (A.2) leads to an objective value  $o_1$ , and the solution of (7) (8) (9) leads to an objective value  $o_2$ . From von Neumann's lower bound trace inequality, we have

$$\text{trace}(C\tilde{\Sigma}) \geq \sum_{k=1}^d \lambda_k(\tilde{\Sigma})\lambda_{d-k+1}(C) = \sum_{k=1}^d \tilde{\lambda}_k(\alpha - d_k)$$

for the second term of (7), since  $\lambda_{d-k+1}(C) = \lambda_{d-k+1}(\alpha - W_0) = \alpha - d_k$ . Consequently, we have  $o_1 \leq o_2$ . The proof is now completed because  $\tilde{U}(\alpha I - \hat{D})\tilde{U}^T$  is in the feasible region of (8) and (9) and it can be verified that when plugging it into (7), the objective function reaches  $o_1$ , which must be a minimum of (7) since  $o_1 \leq o_2$ . This completes the proof of Lemma 2.

With the two lemmas in place, we are now ready to prove Theorem 1.

**Proof of Theorem 1:** First, note that the optimization problem in (A.1) and (A.2) can be reduced to  $d$  subproblems indexed by  $k$ :

$$\begin{aligned} \min_{d_k} \left[ -\ln(\alpha - d_k) + \tilde{\lambda}_k(\alpha - d_k) \right] & \quad (\text{A.3}) \\ \text{subject to } 0 \leq d_k \leq \alpha. & \end{aligned}$$

Note that when  $\tilde{\lambda}_k \leq 1/\alpha = \sigma_N^2$ , the objective function (A.3) is increasing in the feasible region. Therefore, we must have  $\hat{d}_k = 0$ . Otherwise, first order condition leads to  $\hat{d}_k = \alpha - 1/\tilde{\lambda}_k$ . To sum up, we have

$$\hat{d}_k = (\alpha - 1/\tilde{\lambda}_k)_+.$$

Note that the corresponding minimum

$$-\ln(\alpha - \hat{d}_k) + \tilde{\lambda}_k(\alpha - \hat{d}_k) = -\ln\left(\alpha \wedge \frac{1}{\tilde{\lambda}_k}\right) + (1 \wedge \alpha \tilde{\lambda}_k)$$

is an increasing function of  $\tilde{\lambda}_k$ , which suggests that the solution to (A.1) (A.2) is

$$\hat{d}_k = \begin{cases} \alpha - 1/\tilde{\lambda}_k & \text{if } k \leq l \text{ and } \tilde{\lambda}_k > \sigma_N^2 \\ 0 & \text{otherwise.} \end{cases}$$

This completes the proof of Theorem 1.

For Theorem 2, we consider an alternative optimization problem to (7), (8), and (11):

$$\min_{d_1, \dots, d_d} \left[ -\sum_{k=1}^d \ln(\alpha - d_k) + \sum_{k=1}^d \tilde{\lambda}_k(\alpha - d_k) \right] \quad (\text{A.4})$$

$$\text{subject to } 0 \leq d_k \leq \alpha, \quad \sum d_k \leq M, \quad k = 1, \dots, d. \quad (\text{A.5})$$

Let  $\hat{d}_1, \dots, \hat{d}_d$  be the solution to (A.4), (A.5), and  $\hat{\Lambda} = \text{diag}(\hat{d}_1, \dots, \hat{d}_d)$ . Then we have the following lemma which can be proved in the same fashion as Lemma 2.

**Lemma 3.** *The solution to (7) (8) (11) is  $\tilde{U}(\alpha I - \hat{\Lambda})\tilde{U}^T$ .*

**Proof of Theorem 2:**

To solve (A.4) (A.5), we first write them in a Lagrange form

$$\begin{aligned} \min_{d_1, \dots, d_k} \sum_{k=1}^d [-\ln(\alpha - d_k) + \tilde{\lambda}_k(\alpha - d_k) + \tau d_k] \\ \text{subject to } 0 \leq d_k \leq \alpha, \quad k = 1, \dots, d. \end{aligned}$$

which essentially can be solved as  $d$  separate problems. When  $\tilde{\lambda}_k \leq \tau + \sigma_N^2$ ,

$$-\ln(\alpha - d_k) + \tilde{\lambda}_k(\alpha - d_k) + \tau d_k$$

is an increasing function of  $d_k$  in the feasible set  $[0, \alpha]$ . Therefore,  $\hat{d}_k = 0$ . Otherwise, the first order condition yields

$$\hat{d}_k = \alpha - \frac{1}{\tilde{\lambda}_k - \tau}.$$

In other words,

$$\hat{d}_k = \left( \alpha - \frac{1}{\tilde{\lambda}_k - \tau} \right)_+.$$

It is now clear that the tuning parameters  $\tau$  and  $M$  are related through

$$\sum_{k=1}^d \hat{d}_k = \left( \alpha - \frac{1}{\tilde{\lambda}_k - \tau} \right)_+ = M.$$

From Lemma 3, we have

$$\hat{\lambda}_k = \frac{1}{\alpha - \hat{d}_k} = (\tilde{\lambda}_k - \tau - \sigma_N^2)_+ + \sigma_N^2.$$

This completes the proof of Theorem 2.

**Proof of Theorem 3:**

Due to rotation invariance, it is enough to consider the situations with diagonal covariance matrix. Let's first calculate the total sum square TSS.

$$\begin{aligned} \text{TSS} &= \int_{-\infty}^{\infty} \cdots \int_{-\infty}^{\infty} \|\mathbf{x}\|^2 \phi(\mathbf{x}) dx_1 \cdots dx_d \\ &= \int_{-\infty}^{\infty} \cdots \int_{-\infty}^{\infty} \sum_{j=1}^d x_j^2 \left( \prod_{j=1}^d \varphi_{\lambda_j}(x_j) \right) dx_1 \cdots dx_d \\ &= \sum_{j=1}^d \int_{-\infty}^{\infty} x_j^2 \varphi_{\lambda_j}(x_j) dx_j = \sum_{j=1}^d \lambda_j, \end{aligned}$$

where  $\phi(\mathbf{x}) = \prod_{j=1}^d \varphi_{\lambda_j}(x_j) = \prod_{j=1}^d \frac{1}{\sqrt{2\pi\lambda_j}} e^{-x_j^2/2\lambda_j}$ . Now assume that  $\lambda_1 \geq \lambda_2 \geq \dots \geq \lambda_d$ . Then  $(1, 0, \dots, 0)^T$  is the direction of the greatest variation. Thus it makes sense to define the 2-means separating plane as the plane which is through  $\boldsymbol{\mu} = (0, \dots, 0)^T$  and orthogonal to  $(1, 0, \dots, 0)^T$ .

Let  $\text{WSS}_1$  denote the sum square within Class 1 and  $\text{WSS}_2$  the sum square within Class 2. First find center points:  $\boldsymbol{\mu}_1 = (\mu_{11}, \mu_{12}, \dots, \mu_{1d})^T$ . By symmetry, we have  $\mu_{12} = \mu_{13} = \dots = \mu_{1d} = 0$ .

$$\mu_{11} = 2 \int_0^\infty x_1 \varphi_{\lambda_1}(x_1) dx_1 = \sqrt{\frac{2\lambda_1}{\pi}}.$$

Here 2 is the normalization factor. So  $\boldsymbol{\mu}_1 = \left(\sqrt{\frac{2\lambda_1}{\pi}}, 0, \dots, 0\right)^T$ . Similarly,  $\boldsymbol{\mu}_2 = \left(-\sqrt{\frac{2\lambda_1}{\pi}}, 0, \dots, 0\right)^T$ .

Next

$$\begin{aligned} \text{WSS}_1 &= \int_0^\infty \dots \int_{-\infty}^\infty \|\mathbf{x} - \boldsymbol{\mu}_1\|^2 \phi(\mathbf{x}) dx_1 \dots dx_d \\ &= \int_0^\infty \left(x_1 - \sqrt{\frac{2\lambda_1}{\pi}}\right)^2 \varphi_{\lambda_1}(x_1) dx_1 + \sum_{j=2}^d \int_0^\infty \int_{-\infty}^\infty \dots \int_{-\infty}^\infty x_j^2 \phi(\mathbf{x}) dx_1 \dots dx_d \\ &= \left(\frac{\pi - 2}{2\pi}\right) \lambda_1 + \sum_{j=2}^d \frac{\lambda_j}{2}. \end{aligned}$$

Similarly  $\text{WSS}_2 = \text{WSS}_1$ . Thus

$$\text{TCI} = \frac{\text{WSS}_1 + \text{WSS}_2}{\text{TSS}} = 1 - \frac{2}{\pi} \frac{\lambda_1}{\sum_{j=1}^d \lambda_j}.$$

This completes of the proof of Theorem 3.

## B More Simulated Examples

We perform more simulations in this section. The simulation setting is the same as in Section 3.1 but with different dimensions. Tables A, B, and C summarize the results for  $d = 5000$ ,  $d = 300$ , and  $d = 200$  respectively. As dimension increases, there was less anti-conservatism for the hard method. The sample and the soft methods can control the type-I error in all situations.

## References

Mirsky, L. (1975). A trace inequality of John von Neumann. *Monatsh. Math.* 79, 303–306.

Table A: Summary table of empirical SigClust  $p$ -value distribution over 100 replications based on four methods under different settings in Simulation 3.1. The mean and the numbers of  $p$ -values which are less than 0.05 (denoted as N5) and 0.1 (denoted as N10) are reported (d=5000, n=100).

| $v$  | $w$ | True |    |     | Sample |    |     | Hard |     |     | Soft |    |     |
|------|-----|------|----|-----|--------|----|-----|------|-----|-----|------|----|-----|
|      |     | Mean | N5 | N10 | Mean   | N5 | N10 | Mean | N5  | N10 | Mean | N5 | N10 |
| 1000 | 1   | 0.55 | 8  | 13  | 0.65   | 0  | 0   | 0.00 | 100 | 100 | 0.47 | 0  | 0   |
| 200  | 5   | 0.39 | 5  | 12  | 0.98   | 0  | 0   | 0.01 | 98  | 100 | 0.65 | 0  | 0   |
| 100  | 10  | 0.36 | 7  | 16  | 1.00   | 0  | 0   | 0.28 | 5   | 13  | 0.80 | 0  | 0   |
| 40   | 25  | 0.29 | 14 | 22  | 1.00   | 0  | 0   | 1.00 | 0   | 0   | 0.97 | 0  | 0   |
| 20   | 50  | 0.22 | 11 | 24  | 1.00   | 0  | 0   | 1.00 | 0   | 0   | 1.00 | 0  | 0   |
| 10   | 100 | 0.20 | 19 | 31  | 1.00   | 0  | 0   | 1.00 | 0   | 0   | 1.00 | 0  | 0   |
| 200  | 1   | 0.54 | 6  | 11  | 0.97   | 0  | 0   | 0.00 | 100 | 100 | 0.42 | 0  | 0   |
| 100  | 1   | 0.58 | 2  | 4   | 1.00   | 0  | 0   | 0.39 | 5   | 15  | 0.44 | 0  | 0   |
| 50   | 1   | 0.51 | 8  | 10  | 1.00   | 0  | 0   | 1.00 | 0   | 0   | 0.81 | 0  | 0   |
| 40   | 1   | 0.50 | 6  | 9   | 1.00   | 0  | 0   | 1.00 | 0   | 0   | 0.98 | 0  | 0   |
| 30   | 1   | 0.50 | 5  | 8   | 1.00   | 0  | 0   | 1.00 | 0   | 0   | 1.00 | 0  | 0   |
| 20   | 1   | 0.48 | 4  | 6   | 1.00   | 0  | 0   | 1.00 | 0   | 0   | 1.00 | 0  | 0   |
| 10   | 1   | 0.21 | 20 | 28  | 1.00   | 0  | 0   | 1.00 | 0   | 0   | 1.00 | 0  | 0   |
| 50   | 10  | 0.35 | 11 | 20  | 1.00   | 0  | 0   | 0.97 | 0   | 0   | 0.84 | 0  | 0   |
| 40   | 10  | 0.38 | 5  | 15  | 1.00   | 0  | 0   | 1.00 | 0   | 0   | 0.92 | 0  | 0   |
| 30   | 10  | 0.26 | 23 | 36  | 1.00   | 0  | 0   | 1.00 | 0   | 0   | 0.98 | 0  | 0   |
| 20   | 10  | 0.36 | 7  | 13  | 1.00   | 0  | 0   | 1.00 | 0   | 0   | 1.00 | 0  | 0   |
| 10   | 10  | 0.22 | 18 | 27  | 1.00   | 0  | 0   | 1.00 | 0   | 0   | 1.00 | 0  | 0   |
| 50   | 5   | 0.41 | 5  | 17  | 1.00   | 0  | 0   | 0.98 | 0   | 0   | 0.78 | 0  | 0   |
| 40   | 5   | 0.41 | 6  | 13  | 1.00   | 0  | 0   | 1.00 | 0   | 0   | 0.91 | 0  | 0   |
| 30   | 5   | 0.35 | 10 | 16  | 1.00   | 0  | 0   | 1.00 | 0   | 0   | 1.00 | 0  | 0   |
| 20   | 5   | 0.35 | 7  | 13  | 1.00   | 0  | 0   | 1.00 | 0   | 0   | 1.00 | 0  | 0   |
| 10   | 5   | 0.24 | 13 | 27  | 1.00   | 0  | 0   | 1.00 | 0   | 0   | 1.00 | 0  | 0   |
| 50   | 2   | 0.47 | 6  | 12  | 1.00   | 0  | 0   | 0.99 | 0   | 0   | 0.78 | 0  | 0   |
| 40   | 2   | 0.44 | 7  | 14  | 1.00   | 0  | 0   | 1.00 | 0   | 0   | 0.95 | 0  | 0   |
| 30   | 2   | 0.50 | 7  | 13  | 1.00   | 0  | 0   | 1.00 | 0   | 0   | 1.00 | 0  | 0   |
| 20   | 2   | 0.43 | 4  | 9   | 1.00   | 0  | 0   | 1.00 | 0   | 0   | 1.00 | 0  | 0   |
| 10   | 2   | 0.24 | 12 | 23  | 1.00   | 0  | 0   | 1.00 | 0   | 0   | 1.00 | 0  | 0   |
| 5    | 1   | 0.14 | 26 | 50  | 1.00   | 0  | 0   | 1.00 | 0   | 0   | 1.00 | 0  | 0   |
| 3    | 1   | 0.13 | 24 | 51  | 1.00   | 0  | 0   | 1.00 | 0   | 0   | 1.00 | 0  | 0   |
| 1    | 1   | 0.14 | 24 | 47  | 1.00   | 0  | 0   | 1.00 | 0   | 0   | 1.00 | 0  | 0   |

Table B: Summary table of empirical SigClust  $p$ -value distribution over 100 replications based on four methods under different settings in Simulation 3.1. The mean and the numbers of  $p$ -values which are less than 0.05 (denoted as N5) and 0.1 (denoted as N10) are reported (d=300, n=100).

| $v$  | $w$ | True |    |     | Sample |    |     | Hard |     |     | Soft |    |     |
|------|-----|------|----|-----|--------|----|-----|------|-----|-----|------|----|-----|
|      |     | Mean | N5 | N10 | Mean   | N5 | N10 | Mean | N5  | N10 | Mean | N5 | N10 |
| 1000 | 1   | 0.46 | 6  | 18  | 0.48   | 4  | 7   | 0.04 | 77  | 88  | 0.45 | 4  | 9   |
| 200  | 5   | 0.37 | 9  | 14  | 0.75   | 0  | 0   | 0.30 | 1   | 7   | 0.69 | 0  | 0   |
| 100  | 10  | 0.35 | 7  | 12  | 0.90   | 0  | 0   | 0.52 | 0   | 0   | 0.84 | 0  | 0   |
| 40   | 25  | 0.26 | 7  | 24  | 0.99   | 0  | 0   | 0.84 | 0   | 0   | 0.96 | 0  | 0   |
| 20   | 50  | 0.26 | 14 | 26  | 1.00   | 0  | 0   | 0.97 | 0   | 0   | 0.99 | 0  | 0   |
| 10   | 100 | 0.22 | 18 | 34  | 1.00   | 0  | 0   | 1.00 | 0   | 0   | 1.00 | 0  | 0   |
| 200  | 1   | 0.48 | 3  | 5   | 0.53   | 0  | 0   | 0.00 | 100 | 100 | 0.43 | 0  | 0   |
| 100  | 1   | 0.50 | 5  | 15  | 0.58   | 0  | 0   | 0.00 | 100 | 100 | 0.40 | 0  | 1   |
| 50   | 1   | 0.53 | 3  | 9   | 0.65   | 0  | 0   | 0.00 | 100 | 100 | 0.34 | 0  | 2   |
| 40   | 1   | 0.54 | 5  | 7   | 0.73   | 0  | 0   | 0.00 | 100 | 100 | 0.37 | 0  | 2   |
| 30   | 1   | 0.49 | 6  | 9   | 0.78   | 0  | 0   | 0.00 | 100 | 100 | 0.33 | 0  | 2   |
| 20   | 1   | 0.51 | 7  | 11  | 0.87   | 0  | 0   | 0.01 | 97  | 99  | 0.28 | 1  | 3   |
| 10   | 1   | 0.47 | 5  | 12  | 0.98   | 0  | 0   | 0.17 | 19  | 38  | 0.35 | 0  | 0   |
| 50   | 10  | 0.35 | 4  | 11  | 0.92   | 0  | 0   | 0.32 | 0   | 1   | 0.81 | 0  | 0   |
| 40   | 10  | 0.34 | 7  | 15  | 0.92   | 0  | 0   | 0.26 | 2   | 12  | 0.78 | 0  | 0   |
| 30   | 10  | 0.33 | 7  | 15  | 0.94   | 0  | 0   | 0.21 | 6   | 22  | 0.76 | 0  | 0   |
| 20   | 10  | 0.33 | 6  | 15  | 0.97   | 0  | 0   | 0.16 | 4   | 30  | 0.70 | 0  | 0   |
| 10   | 10  | 0.36 | 6  | 11  | 1.00   | 0  | 0   | 0.31 | 2   | 6   | 0.66 | 0  | 0   |
| 50   | 5   | 0.38 | 5  | 10  | 0.83   | 0  | 0   | 0.05 | 60  | 87  | 0.63 | 0  | 0   |
| 40   | 5   | 0.33 | 10 | 13  | 0.84   | 0  | 0   | 0.04 | 80  | 94  | 0.60 | 0  | 0   |
| 30   | 5   | 0.37 | 6  | 11  | 0.88   | 0  | 0   | 0.03 | 85  | 96  | 0.56 | 0  | 0   |
| 20   | 5   | 0.39 | 4  | 13  | 0.94   | 0  | 0   | 0.04 | 71  | 90  | 0.53 | 0  | 0   |
| 10   | 5   | 0.39 | 11 | 18  | 0.99   | 0  | 0   | 0.18 | 12  | 30  | 0.49 | 0  | 0   |
| 50   | 2   | 0.46 | 3  | 6   | 0.72   | 0  | 0   | 0.00 | 100 | 100 | 0.44 | 0  | 0   |
| 40   | 2   | 0.42 | 10 | 15  | 0.75   | 0  | 0   | 0.00 | 100 | 100 | 0.45 | 0  | 0   |
| 30   | 2   | 0.45 | 4  | 6   | 0.80   | 0  | 0   | 0.01 | 98  | 100 | 0.39 | 0  | 1   |
| 20   | 2   | 0.53 | 2  | 4   | 0.90   | 0  | 0   | 0.02 | 92  | 98  | 0.37 | 0  | 0   |
| 10   | 2   | 0.42 | 6  | 14  | 0.99   | 0  | 0   | 0.15 | 23  | 41  | 0.38 | 0  | 0   |
| 5    | 1   | 0.44 | 4  | 7   | 1.00   | 0  | 0   | 0.95 | 0   | 0   | 0.91 | 0  | 0   |
| 3    | 1   | 0.23 | 15 | 23  | 1.00   | 0  | 0   | 1.00 | 0   | 0   | 1.00 | 0  | 0   |
| 1    | 1   | 0.17 | 23 | 38  | 1.00   | 0  | 0   | 1.00 | 0   | 0   | 1.00 | 0  | 0   |

Table C: Summary table of empirical SigClust  $p$ -value distribution over 100 replications based on four methods under different settings in Simulation 3.1. The mean and the numbers of  $p$ -values which are less than 0.05 (denoted as N5) and 0.1 (denoted as N10) are reported (d=200, n=100).

| $v$  | $w$ | True |    |     | Sample |    |     | Hard |     |     | Soft |    |     |
|------|-----|------|----|-----|--------|----|-----|------|-----|-----|------|----|-----|
|      |     | Mean | N5 | N10 | Mean   | N5 | N10 | Mean | N5  | N10 | Mean | N5 | N10 |
| 1000 | 1   | 0.49 | 5  | 10  | 0.50   | 4  | 10  | 0.14 | 44  | 62  | 0.48 | 6  | 11  |
| 200  | 5   | 0.37 | 3  | 14  | 0.76   | 0  | 0   | 0.47 | 0   | 0   | 0.71 | 0  | 0   |
| 100  | 10  | 0.32 | 10 | 18  | 0.87   | 0  | 0   | 0.65 | 0   | 0   | 0.83 | 0  | 0   |
| 40   | 25  | 0.28 | 9  | 20  | 0.98   | 0  | 0   | 0.90 | 0   | 0   | 0.96 | 0  | 0   |
| 20   | 50  | 0.27 | 14 | 25  | 1.00   | 0  | 0   | 0.98 | 0   | 0   | 0.99 | 0  | 0   |
| 10   | 100 | 0.20 | 21 | 34  | 1.00   | 0  | 0   | 1.00 | 0   | 0   | 1.00 | 0  | 0   |
| 200  | 1   | 0.52 | 3  | 6   | 0.55   | 0  | 1   | 0.01 | 96  | 99  | 0.46 | 0  | 3   |
| 100  | 1   | 0.52 | 5  | 7   | 0.60   | 0  | 0   | 0.01 | 96  | 99  | 0.47 | 0  | 0   |
| 50   | 1   | 0.50 | 6  | 9   | 0.62   | 0  | 0   | 0.00 | 100 | 100 | 0.38 | 0  | 2   |
| 40   | 1   | 0.52 | 5  | 7   | 0.64   | 0  | 0   | 0.00 | 99  | 100 | 0.35 | 0  | 0   |
| 30   | 1   | 0.49 | 4  | 10  | 0.69   | 0  | 0   | 0.01 | 100 | 100 | 0.33 | 0  | 1   |
| 20   | 1   | 0.52 | 9  | 10  | 0.77   | 0  | 0   | 0.01 | 94  | 99  | 0.29 | 1  | 4   |
| 10   | 1   | 0.53 | 6  | 8   | 0.93   | 0  | 0   | 0.11 | 28  | 61  | 0.31 | 0  | 5   |
| 50   | 10  | 0.32 | 8  | 20  | 0.89   | 0  | 0   | 0.48 | 0   | 0   | 0.79 | 0  | 0   |
| 40   | 10  | 0.38 | 5  | 11  | 0.92   | 0  | 0   | 0.46 | 0   | 0   | 0.81 | 0  | 0   |
| 30   | 10  | 0.34 | 6  | 10  | 0.92   | 0  | 0   | 0.38 | 0   | 1   | 0.77 | 0  | 0   |
| 20   | 10  | 0.34 | 4  | 12  | 0.94   | 0  | 0   | 0.29 | 0   | 4   | 0.72 | 0  | 0   |
| 10   | 10  | 0.34 | 10 | 19  | 0.98   | 0  | 0   | 0.31 | 1   | 7   | 0.63 | 0  | 0   |
| 50   | 5   | 0.38 | 3  | 12  | 0.81   | 0  | 0   | 0.15 | 10  | 32  | 0.64 | 0  | 0   |
| 40   | 5   | 0.39 | 9  | 12  | 0.82   | 0  | 0   | 0.12 | 21  | 43  | 0.63 | 0  | 0   |
| 30   | 5   | 0.37 | 7  | 17  | 0.84   | 0  | 0   | 0.09 | 32  | 59  | 0.60 | 0  | 0   |
| 20   | 5   | 0.40 | 7  | 15  | 0.88   | 0  | 0   | 0.07 | 40  | 72  | 0.52 | 0  | 0   |
| 10   | 5   | 0.38 | 11 | 17  | 0.96   | 0  | 0   | 0.14 | 15  | 37  | 0.45 | 0  | 0   |
| 50   | 2   | 0.43 | 3  | 11  | 0.69   | 0  | 0   | 0.02 | 96  | 99  | 0.47 | 0  | 0   |
| 40   | 2   | 0.44 | 5  | 8   | 0.71   | 0  | 0   | 0.01 | 95  | 99  | 0.45 | 0  | 0   |
| 30   | 2   | 0.47 | 7  | 11  | 0.75   | 0  | 0   | 0.02 | 95  | 100 | 0.43 | 0  | 1   |
| 20   | 2   | 0.42 | 4  | 13  | 0.80   | 0  | 0   | 0.02 | 94  | 100 | 0.35 | 0  | 1   |
| 10   | 2   | 0.46 | 8  | 9   | 0.94   | 0  | 0   | 0.10 | 33  | 60  | 0.34 | 0  | 2   |
| 5    | 1   | 0.42 | 5  | 13  | 1.00   | 0  | 0   | 0.70 | 0   | 0   | 0.67 | 0  | 0   |
| 3    | 1   | 0.30 | 10 | 17  | 1.00   | 0  | 0   | 0.99 | 0   | 0   | 0.98 | 0  | 0   |
| 1    | 1   | 0.20 | 18 | 38  | 1.00   | 0  | 0   | 1.00 | 0   | 0   | 1.00 | 0  | 0   |
